# Supplementary material
Source: PubMed Central journal article supplement (PMC4082770)
Supplement: NIHMS508800-supplement-01.pdf [file NIHMS508800-supplement-01.pdf]

1  
2  
3 **Supplement 1**

4 We weighed carefully whether we would include the 2 binge eating/purging type individuals with anorexia  
5 nervosa (AN) or not to have a balanced design. The behavioral data suggested no differences and the values for  
6 the 2 subjects were well within the range of the restricting group (see Table S2, available online). When  
7 restricting the statistical comparisons to only the 17 restricting-type anorexic individuals and the 22 controls,  
8 there were similar group differences as when including the 2 binge/purge-type anorexic individuals (see Table  
9 S3, available online). Neuroimaging findings were found in similar regions when comparing the 17 restricting-  
10 type anorexic individuals to 22 CW as when comparing the 19 restricting-type and binge/purge-type anorexic  
11 individuals to 22 CW; however, at a lower significance threshold ( $p < 0.005$  and 50 voxels; see Table S4, available  
12 online). Because the behavioral measures were similar between the 2 binge/purge-type and 17 restricting-type  
13 anorexic individuals and neuroimaging findings were in similar regions, we decided to include the 2 additional  
14 binge/purge-type individuals in our study.  
15  
16  
17  
18  
19  
20  
21  
22  
23  
24  
25  
26  
27  
28  
29  
30  
31  
32  
33  
34  
35  
36  
37  
38  
39  
40  
41  
42  
43  
44  
45  
46  
47  
48  
49  
50  
51  
52  
53  
54  
55  
56  
57  
58  
59  
60  
61  
62  
63  
64  
65

Table S1. Demographic Variables Across Adolescent and Adult Study Groups.

| Anatomical Region          | Control Adolescents (A) |       | Control Adults (B) |       | Anorexia Nervosa Adolescents (C) |       | Anorexia Nervosa Adults (D) |      | F      | p-value |                                |
|----------------------------|-------------------------|-------|--------------------|-------|----------------------------------|-------|-----------------------------|------|--------|---------|--------------------------------|
|                            | Mean                    | SD    | Mean               | SD    | Mean                             | SD    | Mean                        | SD   |        |         |                                |
| Age (years)                | 14.82                   | 1.82  | 27.42              | 6.28  | 15.37                            | 1.42  | 23.11                       | 5.78 | 41.11  | <0.001  | B>A***, D>C***                 |
| BMI (kg/m <sup>2</sup> )   | 21.26                   | 1.92  | 21.64              | 1.26  | 16.17                            | 1.10  | 16.00                       | 1.09 | 102.22 | <0.001  | A>C***, A>D***, B>C***, B>D*** |
| Novelty Seeking            | 22.50                   | 4.95  | 17.92              | 5.16  | 15.11                            | 5.34  | 13.74                       | 6.68 | 10.17  | <0.001  | A>C***, A>D***,                |
| Harm Avoidance             | 10.86                   | 5.89  | 9.58               | 3.99  | 21.16                            | 7.62  | 23.74                       | 5.41 | 32.06  | <0.001  | C>A***, D>A***, C>B***, D>B*** |
| EDI 3 Drive for Thinness   | 1.05                    | 1.84  | 0.75               | 1.87  | 13.68                            | 6.81  | 12.58                       | 6.43 | 48.25  | <0.001  | C>A***, D>A***, C>B***, D>B*** |
| EDI 3 Bulimia              | 0.64                    | 1.05  | 0.13               | 0.45  | 1.05                             | 1.47  | 0.90                        | 1.85 | 2.25   | 0.09    | -----                          |
| EDI 3 Body Dissatisfaction | 1.46                    | 2.22  | 1.38               | 2.14  | 15.58                            | 9.10  | 13.58                       | 7.81 | 34.76  | <0.001  | C>A***, D>A***, C>B***, D>B*** |
| Sensitivity to Reward      | 6.09                    | 3.75  | 4.42               | 2.84  | 8.42                             | 3.82  | 7.21                        | 3.82 | 4.94   | <0.001  | C>B**                          |
| Sensitivity to Punishment  | 4.82                    | 3.63  | 4.04               | 1.85  | 10.95                            | 4.74  | 13.16                       | 4.21 | 31.31  | <0.001  | C>A***, D>A***, C>B***, D>B*** |
| State Anxiety              | 40.41                   | 10.74 | 32.67              | 11.79 | 53.68                            | 11.93 | 50.42                       | 9.68 | 15.97  | <0.001  | C>A**, D>A*, C>B***, D>B***    |
| Trait Anxiety              | 39.86                   | 9.51  | 33.92              | 11.35 | 51.79                            | 15.54 | 51.68                       | 9.68 | 12.41  | <0.001  | C>A*, D>A*, C>B***, D>B***     |

Note: BMI=body mass index; EDI 3=Eating Disorder Inventory–3.

\*p < 0.05; \*\*p < 0.01; \*\*\*p < 0.001

Table S2. Descriptive Statistics of the Binge/Purge Type Adolescents With Anorexia Nervosa (AN).

| Descriptive Statistics       | AN Restricting Type |         |         | AN            | AN            |
|------------------------------|---------------------|---------|---------|---------------|---------------|
|                              | N                   | Minimum | Maximum | Binge/Purge 1 | Binge/Purge 2 |
| Age (years)                  | 17                  | 12      | 17      | 14            | 15            |
| BMI (kg/m <sup>2</sup> )     | 17                  | 14.60   | 18.85   | 15.25         | 15.98         |
| Novelty Seeking              | 17                  | 7       | 27      | 16            | 11            |
| Harm Avoidance               | 17                  | 4       | 31      | 22            | 18            |
| CDI Depression               | 17                  | 1       | 41      | 18            | 15            |
| EDI 3 Drive for Thinness     | 17                  | 1       | 28      | 22            | 24            |
| EDI 3 Bulimia                | 17                  | 0       | 12      | 6             | 4             |
| EDI 3 Body Dissatisfaction   | 17                  | 0       | 40      | 25            | 31            |
| Sensitivity to Reward        | 17                  | 1       | 15      | 12            | 6             |
| Sensitivity to Punishment    | 17                  | 2       | 18      | 9             | 6             |
| State Anxiety                | 17                  | 40      | 76      | 61            | 49            |
| Trait Anxiety                | 17                  | 0       | 77      | 56            | 52            |
| Pleasantness 1 Molar Sucrose | 17                  | 1       | 8       | 1             | 5             |
| Sweetness 1 Molar Sucrose    | 17                  | 6       | 9       | 9             | 8             |

Note: BMI=body mass index; CDI=Children's Depression Inventory; EDI 3=Eating Disorder Inventory-3.

Table S3. Statistical Comparisons Between Control Adolescents (CW) and Adolescents With Restricting-Type Anorexia Nervosa (AN).

|                            | CW, N = 22 |       | AN-Restricting, N = 17 |       | t     | p-value |
|----------------------------|------------|-------|------------------------|-------|-------|---------|
|                            | Mean       | SD    | Mean                   | SD    |       |         |
| Age (years)                | 14.82      | 1.82  | 15.47                  | 1.46  | -1.21 | 0.235   |
| BMI (kg/m <sup>2</sup> )   | 21.26      | 1.92  | 16.24                  | 1.14  | 10.17 | <0.001  |
| Novelty Seeking            | 22.5       | 4.95  | 15.29                  | 5.57  | 4.27  | <0.001  |
| Harm Avoidance             | 10.86      | 5.89  | 21.29                  | 8.04  | -4.68 | <0.001  |
| CDI Depression             | 2.5        | 2.6   | 20.29                  | 10.31 | -6.95 | <0.001  |
| EDI 3 Drive for Thinness   | 1.05       | 1.84  | 13.41                  | 7.16  | -7.6  | <0.001  |
| EDI 3 Bulimia              | 0.64       | 1.05  | 0.94                   | 1.52  | -1.08 | 0.463   |
| EDI 3 Body Dissatisfaction | 1.45       | 2.22  | 15.53                  | 9.62  | -6.54 | <0.001  |
| Sensitivity to Reward      | 6.09       | 3.75  | 8.35                   | 3.9   | -1.83 | 0.075   |
| Sensitivity to Punishment  | 4.82       | 3.63  | 11.35                  | 4.83  | -4.82 | <0.001  |
| State Anxiety              | 40.41      | 10.74 | 53.53                  | 12.46 | -3.53 | 0.001   |
| Trait Anxiety              | 39.86      | 9.51  | 51.53                  | 16.45 | -2.79 | 0.008   |
| Pleasantness 1 M Sucrose   | 5.05       | 2.38  | 3.29                   | 2.51  | 2.22  | 0.033   |
| Sweetness 1 M Sucrose      | 8.45       | 0.74  | 8.53                   | 0.8   | -0.3  | 0.764   |

|                            | CW, N = 22 |      | AN, N = 19 |      | t     | P-value |
|----------------------------|------------|------|------------|------|-------|---------|
|                            | Mean       | SD   | Mean       | SD   |       |         |
| Age (years)                | 14.8       | 1.8  | 15.4       | 1.4  | -1.11 | 0.292   |
| BMI (kg/m <sup>2</sup> )   | 21.3       | 1.9  | 16.2       | 1.1  | 10.19 | <0.001  |
| Novelty Seeking            | 22.5       | 5    | 15.1       | 5.3  | 4.6   | <0.001  |
| Harm Avoidance             | 10.9       | 5.9  | 21.2       | 7.6  | -4.88 | <0.001  |
| CDI Depression             | 2.5        | 2.6  | 19.9       | 9.8  | -8.02 | <0.001  |
| EDI 3 Drive for Thinness   | 1          | 1.8  | 13.7       | 6.8  | -8.38 | <0.001  |
| EDI 3 Bulimia              | 0.6        | 1    | 1.1        | 1.5  | -1.05 | 0.298   |
| EDI 3 Body Dissatisfaction | 1.5        | 2.2  | 15.6       | 9.1  | -7.05 | <0.001  |
| Sensitivity to Reward      | 6.1        | 3.8  | 8.4        | 3.8  | -1.97 | 0.056   |
| Sensitivity to Punishment  | 4.8        | 3.6  | 11         | 4.7  | -4.68 | <0.001  |
| State Anxiety              | 40.4       | 10.7 | 53.7       | 11.9 | -3.75 | 0.001   |
| Trait Anxiety              | 39.9       | 9.5  | 51.8       | 15.5 | -3.01 | 0.005   |
| Pleasantness 1 M Sucrose   | 5.1        | 2.4  | 3.3        | 4.7  | 2.35  | 0.024   |
| Sweetness 1 M Sucrose      | 8.5        | 0.7  | 8.5        | 0.8  | -0.3  | 0.763   |

Note: BMI=body mass index; EDI 3=Eating Disorder Inventory-3.

Table S4. Neuroimaging Findings of Group Differences Between Control Adolescents (CW) and Adolescents With Restricting-Type Anorexia Nervosa (AN-R).

| Whole Brain Volumes                           | (CW, n = 22)    |       | (AN-R, n = 17) |           | t                                      | p-Value                             |
|-----------------------------------------------|-----------------|-------|----------------|-----------|----------------------------------------|-------------------------------------|
|                                               | Mean            | SD    | Mean           | SD        |                                        |                                     |
| GM Volume (cm <sup>3</sup> )                  | 667.38          | 68.33 | 667.39         | 55.21     | -0.001                                 | 0.999                               |
| WM Volume (cm <sup>3</sup> )                  | 472.28          | 45.53 | 464.11         | 45.03     | 0.558                                  | 0.580                               |
| CSF Volume (cm <sup>3</sup> )                 | 252.35          | 49.23 | 230.38         | 24.47     | 1.684                                  | 0.101                               |
| Total Intracranial Volume (cm <sup>3</sup> )  | 1,392.02        | 86.50 | 1361.88        | 92.79     | 1.05                                   | 0.303                               |
| <b>Regional Gray Matter Volume Contrasts</b>  |                 |       |                |           |                                        |                                     |
| AN-R Adolescents > Controls                   | MNI Coordinates |       | Cluster Size   | T/Z       | Cluster Level<br>p <sub>FWE-corr</sub> | Peak Level<br>p <sub>FWE-corr</sub> |
| L Middle Orbitofrontal Cortex                 | -29, 60, -18    |       | 247            | 4.00/3.57 | 0.051                                  | 0.020                               |
| R Fusiform Gyrus                              | 29, -31, -18    |       | 102            | 4.95/4.23 | 0.226                                  | 0.053                               |
| L Fusiform Gyrus                              | -32, -6, -42    |       | 268            | 4.69/4.06 | 0.108                                  | 0.009                               |
| R Hippocampus                                 | 29, -28, -6     |       | 209            | 3.95/3.54 | 0.063                                  | 0.022                               |
| L Hippocampus                                 | -33, -19, -12   |       | 631            | 4.13/3.67 | 0.043                                  | 0.015                               |
| R Insula                                      | 41, 6, 9        |       | 103            | 3.17/2.93 | 0.391                                  | 0.197                               |
| L Insula                                      | -39, 5, 13      |       | 293            | 3.34/3.07 | 0.071                                  | 0.138                               |
| R Parahippocampal Gyrus                       | 18, -10, -29    |       | 696            | 5.50/4.58 | 0.011                                  | 0.001                               |
| L Parahippocampal Gyrus                       | -23, -15, -27   |       | 629            | 4.10/3.65 | 0.015                                  | 0.019                               |
| L Putamen                                     | -30, 11, 9      |       | 68             | 3.32/3.05 | 0.123                                  | 0.083                               |
| L Gyrus Rectus                                | -9, 30, -26     |       | 54             | 3.40/3.12 | 0.111                                  | 0.056                               |
| L Gyrus Rectus                                | -6, 51, -24     |       | 58             | 3.26/3.00 | 0.107                                  | 0.075                               |
| <b>Regional White Matter Volume Contrasts</b> |                 |       |                |           |                                        |                                     |
| AN-R Adolescents > Controls                   | MNI Coordinates |       | Cluster Size   | T/Z       | Cluster Level<br>p <sub>FWE-corr</sub> | Peak Level<br>p <sub>FWE-corr</sub> |
| R Hippocampus                                 | 26, -16, -20    |       | 388            | 5.73/4.72 | 0.028                                  | 0.000                               |
| R Parahippocampal Gyrus                       | 27, -18, -23    |       | 338            | 5.25/4.42 | 0.038                                  | 0.001                               |
| R Middle Temporal Gyrus                       | 50, -31, -6     |       | 101            | 4.17/3.70 | 0.346                                  | 0.063                               |

Note: CSF= cerebrospinal fluid; GM=gray matter; L=left; MNI=Montreal Neurological Institute; R=right; WM=white matter.
